# Supplementary material
Source: PubMed Central journal article supplement (PMC7960440)
Supplement: 16-01093.pdf [file 16-01093.pdf]

## ON-LINE APPENDIX

### Detailed Image Postprocessing

First, the ROIs were drawn by the consensus of 2 neuroradiologists blinded to the clinical information, using a semiautomatic signal-intensity-threshold method to include the entire enhanced portion of the tumors on 3D postcontrast T1-weighted images, while avoiding necrotic or cystic portions. Masks of enhancing tumors were generated from 3D postcontrast T1-weighted images. Second, the 3D postcontrast T1-weighted images were coregistered to the last phase of DCE-MR imaging source images, with an affine transformation and normalized mutual information. With the resulting matrix, the enhancing tumor masks were coregistered to the DCE MR imaging source images. Third, on DCE-MR imaging source images, the region outside the enhancing tumor was removed for ease of computation, using the coregistered masks. Finally, the wash-in phase was determined from each pixel of the enhancing tumors, and the corresponding IAUC values were calculated.

### Genetic Profile Analysis

*MGMT* promoter methylation status was evaluated with the methylation-specific polymerase chain reaction, which was retrospectively recorded from pathologic reports. Along with *MGMT* promoter methylation status, 3 other genetic or molecular profiles of glioblastoma, including *IDH1* mutation, EGFR expression, and 1p/19q codeletion were identified. *IDH1* mutations were identified with *IDH1* mutation-specific immunohistochemical

staining. The expression status of the EGFR protein was visually scored on a medium-power field ( $\times 200$ ), with the scale from 0 to 3+. We defined 0, 1+, and 2+ as negative EGFR expression, and 3+ as positive EGFR expression for statistical analysis. The 1p/19q status was analyzed by polymerase chain reaction–based loss of heterozygosity analysis. Tumors were considered 1p/19q codeleted if there was an entire loss of 1p and an entire loss of 19q with centromeric breakpoints.

### Differences in IAUC Parameters according to *IDH1* Mutations, EGFR Expression, and 1p/19q Codeletion

The IAUC parameters showed a trend toward higher values in the tumors with *IDH1* mutations, compared with those with wild type *IDH* ( $14.6 \pm 1.5$  versus  $12.6 \pm 2.2$ ,  $P = .052$  for  $IAUC_{30_{mean}}$ ;  $35.1 \pm 4.0$  versus  $32.2 \pm 4.6$ ,  $P = .179$  for  $IAUC_{60_{mean}}$ ). In linear regression with *MGMT* and *IDH1* mutation status to assess the significant determinant of IAUC values, *IDH1* mutation status was not significant ( $P = .212$  and  $0.460$  for  $IAUC_{30_{mean}}$  and  $IAUC_{60_{mean}}$ , respectively) and only *MGMT* status was a significant determinant ( $P = .020$  and  $0.047$  for  $IAUC_{30_{mean}}$  and  $IAUC_{60_{mean}}$ , respectively). No significant differences in IAUC parameters were found according to EGFR expression ( $12.8 \pm 2.0$  versus  $12.7 \pm 2.4$ ,  $P = .777$  for  $IAUC_{30_{mean}}$ ;  $32.7 \pm 4.2$  versus  $32.1 \pm 4.9$ ,  $P = .542$  for  $IAUC_{60_{mean}}$ ) and 1p/19q codeletion ( $12.6 \pm 2.3$  versus  $12.7 \pm 2.2$ ,  $P = .858$  for  $IAUC_{30_{mean}}$ ;  $32.1 \pm 4.4$  versus  $32.4 \pm 4.6$ ,  $P = .823$  for  $IAUC_{60_{mean}}$ ).

**On-line Table 1: MGMT promoter methylation status and other clinical characteristics of the patients<sup>a</sup>**

| Clinical Characteristics                     | MGMT Status    |                       |                     | P Value <sup>b</sup> |
|----------------------------------------------|----------------|-----------------------|---------------------|----------------------|
|                                              | Total (n = 88) | Unmethylated (n = 51) | Methylated (n = 37) |                      |
| Median OS (days)                             | 521            | 442                   | 790                 | .014                 |
| No. of deaths                                | 50 (57%)       | 34 (67%)              | 16 (43%)            |                      |
| Median PFS (days)                            | 376            | 272                   | 657                 | .003                 |
| No. of tumor progression                     | 64 (72%)       | 42 (82%)              | 22 (59%)            |                      |
| Age (yr)                                     |                |                       |                     |                      |
| Median (range)                               | 59.4 (1.2)     | 58.0 (1.7)            | 61.2 (1.7)          | .199                 |
| Sex                                          |                |                       |                     |                      |
| Male                                         | 44 (50%)       | 23 (45%)              | 21 (57%)            | .280                 |
| Female                                       | 44 (50%)       | 28 (55%)              | 16 (43%)            |                      |
| KPS                                          |                |                       |                     |                      |
| Median (range)                               | 73.4 (1.5)     | 72.5 (2.0)            | 74.6 (2.2)          | .496                 |
| Extent of resection                          |                |                       |                     |                      |
| Total                                        | 46 (52%)       | 25 (49%)              | 21 (57%)            | .338                 |
| Subtotal                                     | 32 (36%)       | 18 (35%)              | 14 (38%)            |                      |
| Partial                                      | 6 (7%)         | 4 (8%)                | 2 (5%)              |                      |
| Biopsy only                                  | 4 (5%)         | 4 (8%)                | 0 (0%)              |                      |
| Postoperative treatment                      |                |                       |                     |                      |
| CCRT                                         | 74 (84%)       | 44 (86%)              | 30 (82%)            | .261                 |
| RTx                                          | 7 (8%)         | 5 (10%)               | 2 (5%)              |                      |
| CTx                                          | 2 (2%)         | 0 (0%)                | 2 (5%)              |                      |
| None                                         | 5 (6%)         | 2 (4%)                | 3 (8%)              |                      |
| Histopathology                               |                |                       |                     |                      |
| GBM                                          | 77 (87%)       | 46 (90%)              | 31 (84%)            | .369                 |
| GBM with oligodendroglial component          | 11 (13%)       | 5 (10%)               | 6 (16%)             |                      |
| Conventional MRI findings                    |                |                       |                     |                      |
| Volume of enhancing tumor (cm <sup>3</sup> ) | 25.3 (2.4)     | 26.2 (3.2)            | 24.1 (3.6)          | .673                 |
| Edema                                        |                |                       |                     |                      |
| None                                         | 21 (24%)       | 10 (20%)              | 11 (30%)            |                      |
| Mild to moderate                             | 27 (31%)       | 16 (31%)              | 11 (30%)            |                      |
| Severe                                       | 40 (45%)       | 25 (49%)              | 15 (40%)            |                      |
| nCET                                         |                |                       |                     |                      |
| Negative                                     | 44 (50%)       | 24 (47%)              | 20 (54%)            | .517                 |
| Positive                                     | 44 (50%)       | 27 (53%)              | 17 (46%)            |                      |
| Eloquent brain involvement                   |                |                       |                     |                      |
| Yes                                          | 27 (31%)       | 15 (29%)              | 12 (32%)            | .762                 |
| No                                           | 61 (69%)       | 36 (71%)              | 25 (68%)            |                      |
| Deep white matter invasion                   |                |                       |                     |                      |
| Yes                                          | 55 (63%)       | 33 (65%)              | 22 (60%)            |                      |
| No                                           | 33 (37%)       | 18 (35%)              | 15 (40%)            |                      |

**Note:**—KPS indicates Karnofsky performance status; CCRT, concurrent chemoradiotherapy; RTx, radiotherapy; CTx, chemotherapy.

<sup>a</sup> Data are expressed as mean with SD in parentheses or number with percentage in parentheses.

<sup>b</sup> Calculated from the Student *t* test for continuous variables and the  $\chi^2$  test for categorical variables, if not otherwise mentioned.

<sup>c</sup> Calculated from the log-rank test.

**On-line Table 2: Genetic characteristics in 88 patients<sup>a</sup>**

| Parameters                       | Value    |
|----------------------------------|----------|
| MGMT promoter methylation status |          |
| Methylated                       | 51 (58%) |
| Unmethylated                     | 37 (42%) |
| IDH1 status                      |          |
| IDH1 mutation <sup>b</sup>       | 5 (6%)   |
| IDH1 wild type                   | 82 (93%) |
| NA                               | 1 (1%)   |
| EGFR                             |          |
| High (3+)                        | 44 (50%) |
| Low (0–2+)                       | 44 (50%) |
| 1p/19q codeletion                |          |
| Codeleted                        | 10 (12%) |
| Not codeleted                    | 76 (86%) |
| NA                               | 2 (2%)   |

**Note:**—NA indicates not applicable.

<sup>a</sup> Data are No. of patients with percentages in parentheses.

<sup>b</sup> All patients with IDH1 mutation belonged to the methylated MGMT group.

**On-line Table 3: Univariate analysis of initial area under the curve histogram parameters, MGMT status, clinical factors, and conventional MRI findings as predictors of overall survival and progression-free survival in the entire cohort (n = 88)**

| Parameters                                   | OS                                         |                  |                      | PFS                                        |                  |                      |
|----------------------------------------------|--------------------------------------------|------------------|----------------------|--------------------------------------------|------------------|----------------------|
|                                              | Cutoff Value                               | HR (95% CI)      | P Value <sup>a</sup> | Cutoff Value                               | HR (95% CI)      | P Value <sup>a</sup> |
| IAUC parameters                              |                                            |                  |                      |                                            |                  |                      |
| IAUC30 <sub>mean</sub>                       | ≥10.9                                      | 1.86 (0.90–3.84) | .090                 | ≥15.2                                      | 0.60 (0.28–1.25) | .166                 |
| IAUC60 <sub>mean</sub>                       | ≥28.4                                      | 2.16 (0.91–5.10) | .072                 | ≥35.7                                      | 0.62 (0.31–1.26) | .186                 |
| MGMT                                         | Unmethylated                               | 2.14 (1.15–4.00) | .014                 | Unmethylated                               | 2.23 (1.29–3.84) | .003                 |
| Other prognostic factors                     |                                            |                  |                      |                                            |                  |                      |
| Age (yr)                                     | ≥66                                        | 1.81 (1.01–3.25) | .042                 | ≥70                                        | 1.98 (1.07–3.66) | .027                 |
| Sex                                          | Male                                       | 0.97 (0.55–1.69) | .906                 | Male                                       | 1.17 (0.71–1.92) | .541                 |
| KPS                                          | ≥0                                         | 0.70 (0.40–1.23) | .213                 | 70                                         | 0.69 (0.39–1.22) | .199                 |
| Extent of resection                          | Subtotal, partial resection or biopsy only | 1.94 (1.10–3.43) | .020                 | Subtotal, partial resection or biopsy only | 1.65 (1.01–2.71) | .045                 |
| Postoperative treatment                      | RTx, CTx, or none                          | 2.92 (1.52–5.63) | .001                 | RTx, CTx, or none                          | 2.84 (1.53–5.29) | .001                 |
| Histopathology                               | GBM with oligodendroglial component        | 0.96 (0.41–2.25) | .918                 | GBM with oligodendroglial component        | 0.91 (0.41–2.00) | .813                 |
| Conventional MRI findings                    |                                            |                  |                      |                                            |                  |                      |
| Volume of enhancing tumor (cm <sup>3</sup> ) | ≥30.2                                      | 2.88 (1.62–5.12) | <.001                | ≥30.2                                      | 1.93 (1.13–3.30) | .015                 |
| Edema                                        | ≥Mild or severe edema                      | 0.83 (0.47–1.46) | .517                 | Mild or severe edema                       | 0.74 (0.45–1.22) | .236                 |
| nCET                                         | Positive                                   | 1.33 (0.76–2.32) | .321                 | Positive                                   | 1.54 (0.93–2.54) | .093                 |
| Eloquent brain involvement                   | Yes                                        | 1.83(1.04–3.23)  | .033                 | Yes                                        | 1.34(0.80–2.26)  | .264                 |
| Deep white matter invasion                   | Yes                                        | 1.52 (0.83–2.79) | .170                 | Yes                                        | 1.14 (0.69–1.91) | .607                 |

**Note:**—KPS indicates Karnofsky performance status; HR, hazard ratio.

<sup>a</sup> Calculated from the log-rank test.

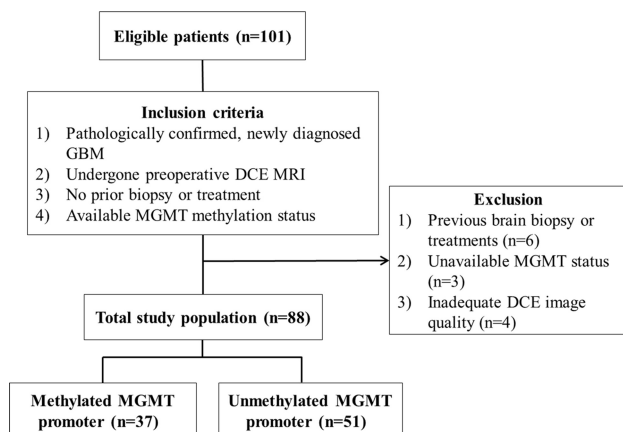

**ON-LINE FIG 1.** Flowchart showing the enrollment process of the study population.

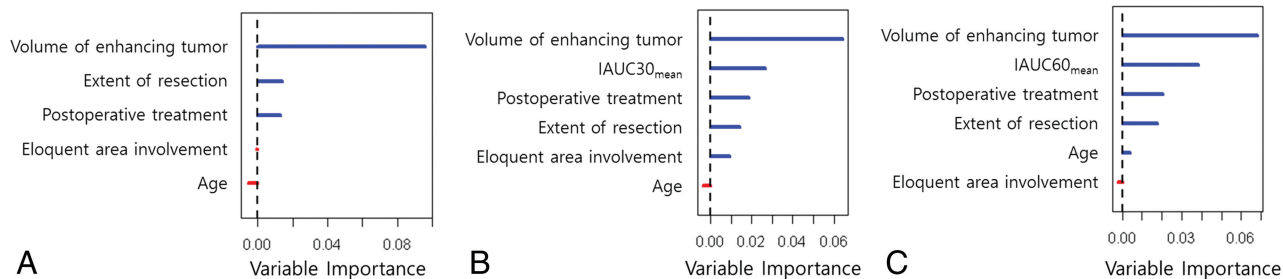

**ON-LINE FIG 2.** Graphs depicting variable importance scores from random survival forests for OS. *A*, In OS model 0 without IAUC parameters, the volume of enhancing tumor was the top predictor. In OS model 1 with IAUC<sub>30,mean</sub> (*B*) and OS model 2 with IAUC<sub>60,mean</sub> (*C*), the IAUC parameters were the second most important variable, following the volume of enhancing tumor as the top variable, and followed by postoperative treatment as the third most important variable. Variable importance is denoted positively (blue bars to the right) or negatively (red bars to the left), depending on whether inclusion of that variable in the classification increases or reduces the accuracy of survival prediction.

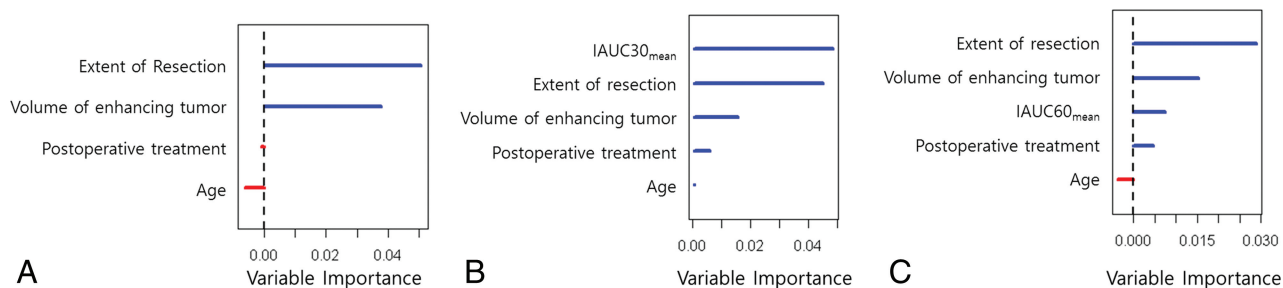

**ON-LINE FIG 3.** Graphs depicting the variable importance scores from random survival forests for PFS. *A*, In PFS model 0 without IAUC parameters, the extent of resection was the top predictor. *B*, In PFS model 1, IAUC<sub>30,mean</sub> was the most important variable, followed by extent of resection and volume of enhancing tumor as the second and third most important variables, respectively. *C*, On the contrary, in PFS model 2, IAUC<sub>60,mean</sub> was the third most important variable, following the extent of resection and volume of enhancing tumor as the first and second most important variables, respectively. Variable importance is denoted positively (blue bars to the right) or negatively (red bars to the left), depending on whether inclusion of that variable in the classification increases or reduces the accuracy of the survival prediction.

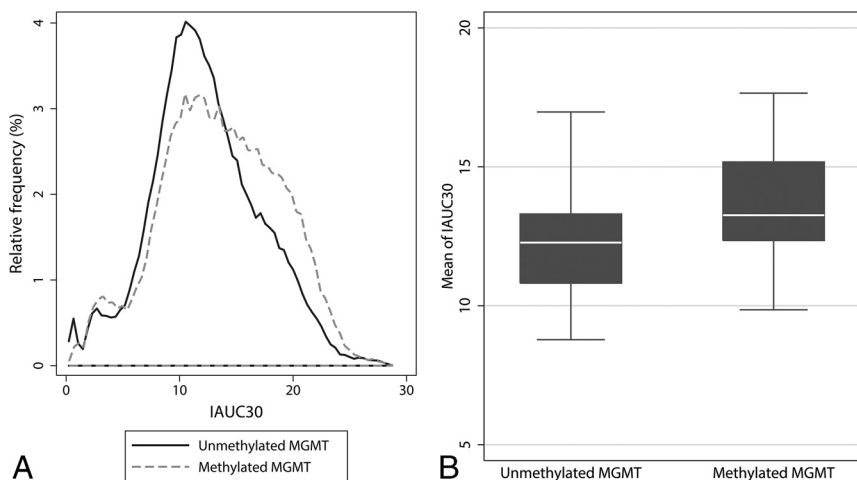

**ON-LINE FIG 4.** Relative frequency histogram of IAUC30 (*A*) and boxplot of IAUC<sub>30,mean</sub> (*B*) according to the *MGMT* status. Tumors with methylated *MGMT* promoter status showed a greater percentage of pixels of high IAUC30 values than those with unmethylated *MGMT* promoter status. IAUC<sub>30,mean</sub> was significantly higher in the methylated *MGMT* group ( $13.5 \pm 2.2$ ) than in the unmethylated *MGMT* group ( $12.2 \pm 2.1$ ,  $P = .007$ ).
